# Supplementary material
Source: ML conference proceedings conference paper supplement (https://aclanthology.org/D19-1163)
Supplement: Attachment [file Span_based_parsing__EMNLP_short_ appendix.pdf › Span_based_parsing__EMNLP_short_ appendix.pdf]

# Span-based Hierarchical Semantic Parsing for Task-Oriented Dialog: Supplementary Material

## A Span embedding features

We slightly modify the span embedder from Lee et al. (2017) as follows. To compute the embeddings of spans  $x_{i:j}$  in an utterance  $x = (x_0, \dots, x_{n-1})$ , We first add boundary tokens  $x_{-1} = \langle \text{BOS} \rangle$  and  $x_n = \langle \text{EOS} \rangle$ . We then embed each token  $x_i$  as a vector  $e_i$ , and then apply multi-layered bidirectional LSTMs. Let  $h_i^F$  and  $h_i^B$  be the  $i$ th forward and backward hidden states, and let  $h_i$  be their concatenation. The embedding of span  $x_{i:j} = (x_i, \dots, x_{j-1})$  is then a concatenation of the following vectors:

- Endpoint hidden states:  $h_i$  and  $h_{j-1}$ .
- Uniform average of hidden states:

$$h_{\text{uni}} = \frac{1}{j-i} (h_i + \dots + h_{j-1}). \quad (1)$$

- The difference in hidden state after reading the span in each direction (Cross and Huang, 2016; Stern et al., 2017):  $h_{j-1}^F - h_{i-1}^F$  and  $h_i^B - h_j^B$ .
- The attention-weighted average of token embeddings (Lee et al., 2017; He et al., 2018): we compute attention weights over the  $j-i$  positions:

$$a_k \propto \exp [w_a^\top h_k]. \quad (2)$$

Then we average the token embeddings:

$$h_{\text{att}} = \sum_{k=i}^{j-1} a_k e_k. \quad (3)$$

- Span length (Lee et al., 2017; He et al., 2018): we bin the length into buckets [1, 2, 3, 4, 5–7, 8–15, 16–31, 32–63, 64+] and use a 20-dimension embedding to represent each bucket.

## B Hyperparameters and training details

Tokens appearing less than 2 times in training data are converted into UNK tokens. We also perform word dropout with probability proportional to the frequency of the word in training data.

To compute the node scores  $f_n$  and edge scores  $f_e$ , we apply 2-layer feedforward networks with hidden sizes of 200 over the span embeddings. Label embeddings in  $f_e$  are 150 dimensional. The parameters are trained using Adam (Kingma and Ba, 2015) with the initial learning rate of  $5 \times 10^{-4}$  and early stopping. We apply dropout with probability 0.2 before each LSTM and feedforward layer.

## References

- James Cross and Liang Huang. 2016. Span-based constituency parsing with a structure-label system and provably optimal dynamic oracles. In *Empirical Methods in Natural Language Processing (EMNLP)*.
- Luheng He, Kenton Lee, Omer Levy, and Luke S. Zettlemoyer. 2018. Jointly predicting predicates and arguments in neural semantic role labeling. In *Association for Computational Linguistics (ACL)*.
- Diederik P. Kingma and Jimmy Ba. 2015. Adam: A method for stochastic optimization. In *International Conference on Learning Representations (ICLR)*.
- Kenton Lee, Luheng He, Mike Lewis, and Luke S. Zettlemoyer. 2017. End-to-end neural coreference resolution. In *Empirical Methods in Natural Language Processing (EMNLP)*.
- Mitchell Stern, Jacob Andreas, and Dan Klein. 2017. A minimal span-based neural constituency parser. In *Association for Computational Linguistics (ACL)*.
